# Supplementary material for: Treatment of crude oil contaminated wastewater via an electrochemical reaction
Source: Royal Society of Chemistry journal article supplement (doi:10.1039/c9ra09202a), 2020-01-01
Supplement: c9ra09202a1.pdf [file c9ra09202a1.pdf]

**Supplementary Information for**

**Treatment of crude oil contaminated wastewater via an electrochemical reaction**

Khanindra Sharma<sup>1</sup>, Suravi Kalita<sup>1</sup>, Neelotpal Sen Sarma<sup>2</sup>, Arundhuti Devi<sup>1\*</sup>

<sup>1</sup>Environmental Chemistry Laboratory, Resource Management and Environment Section, Life Sciences Division, Institute of Advanced Study in Science and Technology, Guwahati 781035, Assam, India

<sup>2</sup>Advanced Materials Laboratory, Physical Sciences Division, Institute of Advanced Study in Science and Technology, Guwahati 781035, Assam, India

<sup>a\*</sup>Dr Arundhuti Devi, Environmental Chemistry Laboratory, Resource Management and Environment Section, Life Science Division, Institute of Advanced Study in Science and Technology (IASST), Guwahati, 781035, Assam, India. Fax: + 91-361-2273062, E-mail: [deviarundh2@yahoo.co.in](mailto:deviarundh2@yahoo.co.in)

## Supplementary figures

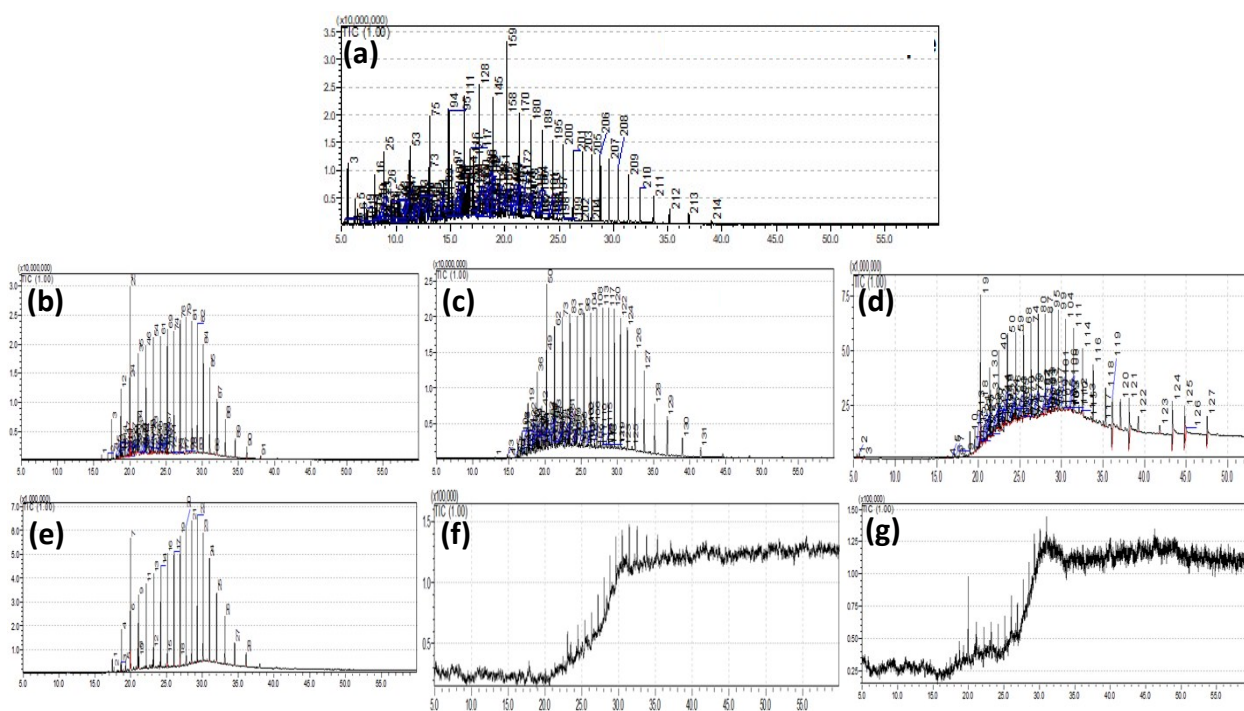

Fig 1: GCMS Chromatogram of (a): untreated sample, (b): hydrocarbons adsorbed by ZnO NPs (produced at 9 volt), (c): hydrocarbons adsorbed by ZnO NPs (produced at 12 volt), (d): hydrocarbons adsorbed by ZnO NPs (produced at 15 volt), (e): treated sample (by 9 volt), (f): treated sample (by 12 volt), (g): treated sample (by 15 volt)

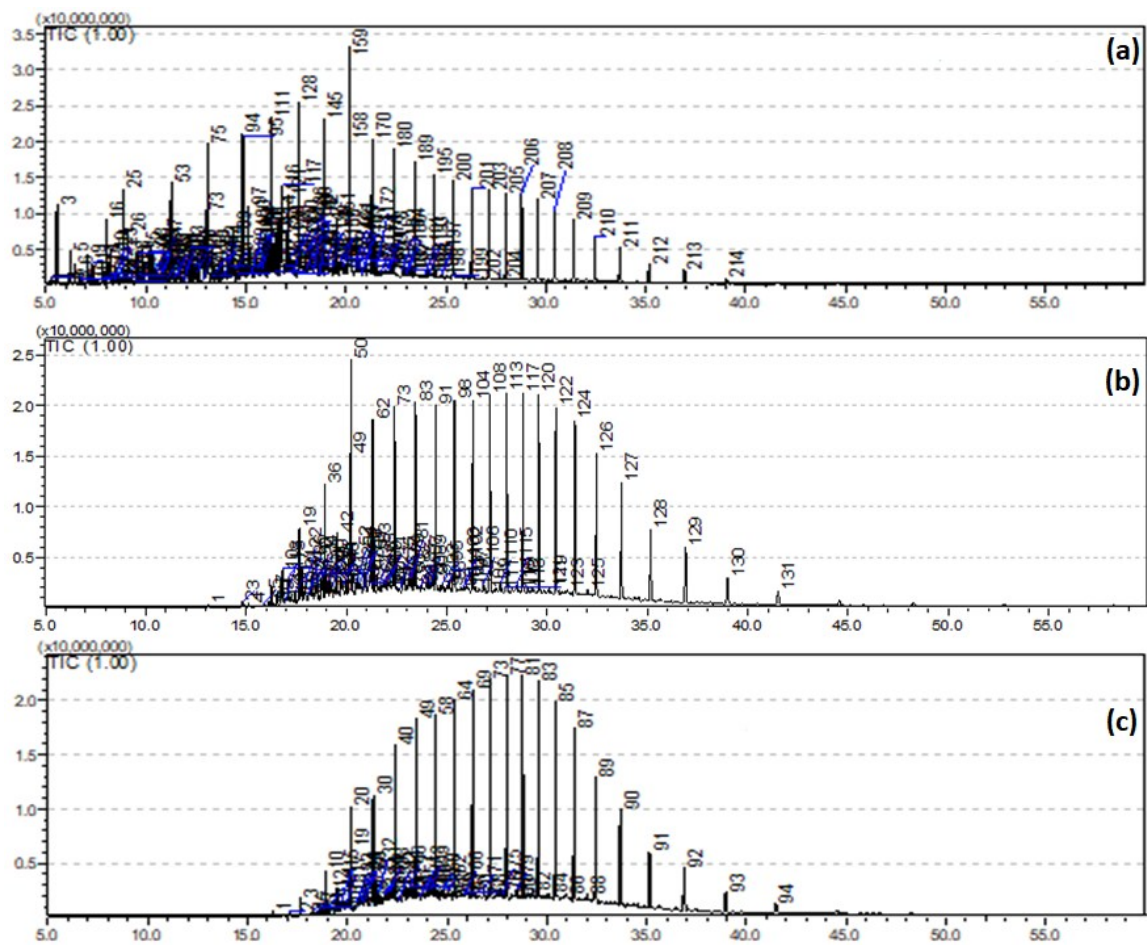

Fig. 2: GCMS Chromatogram of (a) Untreated formation water sample, (b) Petroleum hydrocarbons adsorbed/absorbed by ZnO NPs and (c) Petroleum hydrocarbons adsorbed/absorbed by reused ZnO NPs of reactions taking place at 12 volts.

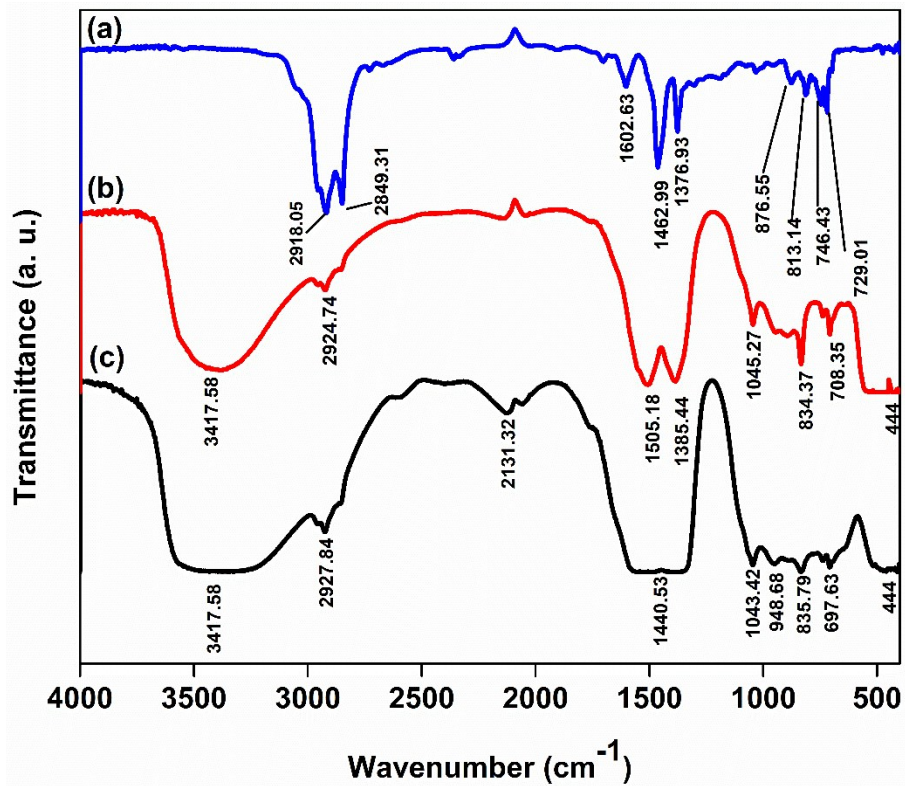

Fig 3. FTIR spectra of (a) Crude oil extracted from formation water, (b) ZnO NP with adsorbed petroleum HC and (c) Reused ZnO NPs with adsorbed petroleum hydrocarbon.

## Supplementary Tables:

Table1: Types of aromatic hydrocarbons present in the untreated formation water sample.

| Sl. No | Name or type                                    | Total no. of compound | peak no/Retention time(in min)                                                                                                                                                                                                                                            |
|--------|-------------------------------------------------|-----------------------|---------------------------------------------------------------------------------------------------------------------------------------------------------------------------------------------------------------------------------------------------------------------------|
| 1      | Derivatives of Benzene                          | 27                    | 2/5.29, 3/5.546, 5/6.204, 14/7.85, 16/8.046, 22/8.5, 25/8.89, 27/9.216, 28/9.266, 31/9.505, 32/9.558, 37/10.135, 39/10.344, 41/10.468, 48/10.936, 49/10.985, 54/11.354, 57/11.558, 58/11.598, 59/11.67, 65/12.263, 80/13.544, 81/13.625, 84/13.932, 93/14.656, 113/16.479 |
| 2      | Derivatives of Naphthalene                      | 14                    | 73/12.955, 95/14.868, 103/15.58, 112/16.37, 116/16.756, 117/16.821, 120/17.055, 129/17.708, 132/17.93, 134/18.062, 137/18.303, 140/18.505, 148/19.158, 173/21.676                                                                                                         |
| 3      | 1,1'-Bicyclopentyl                              | 1                     | 41/10.468                                                                                                                                                                                                                                                                 |
| 4      | Bicyclo[4.2.1]nona-2,4,7-triene, 7-ethyl-       | 1                     | 82/13.76                                                                                                                                                                                                                                                                  |
| 5      | Phenol, 3,6-difluoro-2-methoxy-                 | 1                     | 98/15.185                                                                                                                                                                                                                                                                 |
| 6      | 8,9-Dimethylbicyclo[4.4.1]undeca-2,4,8-triene   | 1                     | 106/15.789                                                                                                                                                                                                                                                                |
| 7      | 2-(4-Pentenyl)-6-pentylpiperidine               | 1                     | 110/16.125                                                                                                                                                                                                                                                                |
| 8      | 3-Cyclohepten-1-ol, 3-phenyl-                   | 1                     | 133/17.985                                                                                                                                                                                                                                                                |
| 9      | Pyridinium, 1-hexadecyl-, chloride, monohydrate | 1                     | 139/18.454                                                                                                                                                                                                                                                                |

|    |                                             |   |                                    |
|----|---------------------------------------------|---|------------------------------------|
| 10 | 1,1'-Biphenyl, 3,4'-dimethyl-               | 1 | 146/18.99                          |
| 11 | Chamazulene                                 | 1 | 157/20.077                         |
| 12 | 4a,9a-Methano-9H-fluorene                   | 1 | 161/20.472                         |
| 13 | 9H-Fluorene, 9-methyl-                      | 1 | 162/20.575                         |
| 14 | Phenanthrene                                | 1 | 172/21.541                         |
| 15 | 1,1'-biphenyl, 4-(1-azido-1-methylethyl)-   | 1 | 175/21.852                         |
| 16 | 1,1'-Bicyclopentyl                          | 1 | 41/10.468                          |
| 17 | [14]Annulene, 1,6:7,12-bis(methano)-, anti- | 1 | 191/23.95                          |
| 18 | Phenanthrene derivative                     | 3 | 182/22.809, 185/23.086, 194/24.215 |

Table 2: Types of aromatic hydrocarbons adsorbed by ZnO nanoparticles

| Serial No. | Name or type                  | Total number of compounds | Peak number/ Retention time                                                                               |
|------------|-------------------------------|---------------------------|-----------------------------------------------------------------------------------------------------------|
| 1          | Derivatives of Naphthalene    | 10                        | 3/14.864, 8/16.365, 14/17.055, 20/17.711, 22/17.932, 24/18.065, 27/18.214, 31/18.507, 39/19.16, 65/21.679 |
| 2          | 3-Cyclohepten-1-ol, 3-phenyl- | 1                         | 23/17.985                                                                                                 |
| 3          | 1,1'-Biphenyl, 3,4'-dimethyl- | 1                         | 37/18.993                                                                                                 |
| 4          | Chamazulene                   | 1                         | 48/20.079                                                                                                 |

|   |                             |   |                                   |
|---|-----------------------------|---|-----------------------------------|
| 5 | 4a,9a-Methano-9H-fluorene   | 1 | 52/20.473                         |
| 6 | 9H-Fluorene, 9-methyl-      | 1 | 53/20.577                         |
| 7 | Phenanthrene                | 1 | 64/21.543                         |
| 8 | Derivatives of phenanthrene | 3 | 76/22.81, 79/23.088,<br>90/24.261 |
